# Supplementary material for: A miniaturized bionic ocean-battery mimicking the structure of marine microbial ecosystems
Source: PubMed Central journal article supplement (PMC9509365; doi:10.1038/s41467-022-33358-x), 2022-09-24
Supplement: 41467_2022_33358_MOESM3_ESM.pdf [file 41467_2022_33358_MOESM3_ESM.pdf]

## **Description of Additional Supplementary Files**

**File Name:** Supplementary Data 1

**Description:** The performance of previously demonstrated bio-solar cells (by using whole microorganisms).

**File Name:** Supplementary Data 2

**Description:** The sequences of primers used in this study.

**File Name:** Supplementary Data 3

**Description:** The sequences of sucrose metabolism genes used in this study.
